# Supplementary material
Source: PubMed Central journal article supplement (PMC6094386)
Supplement: NIHMS983130-supplement-Supp_.pdf [file NIHMS983130-supplement-Supp_.pdf]

# Supporting Information for

## **Linkages between mineralogy, fluid chemistry and microbial communities within hydrothermal chimneys from the Endeavour Segment, Juan de Fuca Ridge**

**T. J. Lin<sup>1</sup>, H. C. Ver Eecke<sup>1</sup>, E. A. Breves<sup>2</sup>, M. D. Dyar<sup>2</sup>, J. W. Jamieson<sup>3,4</sup>, M. D. Hannington<sup>3</sup>, H. Dahle<sup>5</sup>, J. L. Bishop<sup>6</sup>, M. D. Lane<sup>7</sup>, D. A. Butterfield<sup>8</sup>, D. S. Kelley<sup>9</sup>, M. D. Lilley<sup>9</sup>, J. A. Baross<sup>9</sup>, and J. F. Holden<sup>1</sup>**

<sup>1</sup>Department of Microbiology, University of Massachusetts, Amherst, Massachusetts, USA, <sup>2</sup>Department of Astronomy, Mount Holyoke College, South Hadley, Massachusetts, USA, <sup>3</sup>Department of Earth Sciences, University of Ottawa, Ottawa, Ontario, Canada, <sup>4</sup>GEOMAR, Helmholtz Centre for Ocean Research, Kiel, Germany, <sup>5</sup>Department of Biology, Centre for Geobiology, University of Bergen, Bergen, Norway, <sup>6</sup>SETI Institute/NASA Ames Research Center, Moffett Field, California, USA, <sup>7</sup>Planetary Science Institute, Tucson, Arizona, USA, <sup>8</sup>Joint Institute for the Study of the Atmosphere and Ocean, University of Washington, Seattle, Washington, USA, <sup>9</sup>School of Oceanography, University of Washington, Seattle, Washington, USA

### **Contents of this file**

Tables S1 to S4

### **Introduction**

This supporting information provides data tables for Mössbauer spectroscopy, microbial community composition and characteristics, microbial diversity index analyses, and most-probable-number of viable cell estimates.

Table S1. Mössbauer parameters at 295 K and 4 K

| Parameter                   | Species      | Bastille |      | Dante |       | Hot Harold |       |
|-----------------------------|--------------|----------|------|-------|-------|------------|-------|
| Temp (K)                    |              | 295      | 4    | 295   | 4     | 295        | 4†    |
| Isomer Shift (mm/s)         |              |          |      |       |       | 0.40       |       |
| Quadrupole Splitting (mm/s) |              |          |      |       |       | 0.25       |       |
| Width (mm/s)                | unknown      |          |      |       |       | 0.35       |       |
| Area (% of total area)      |              |          |      |       |       | 25         |       |
| Isomer Shift (mm/s)         |              | 0.31     | 0.41 | 0.32  | 0.40  | 0.35       | 0.44  |
| Quadrupole Splitting (mm/s) | sulfide      | 0.61     | 0.60 | 0.60  | 0.61  | 0.61       | 0.65  |
| Width (mm/s)                |              | 0.39     | 0.90 | 0.42  | 0.40  | 0.28       | 0.45* |
| Area (% of total area)      |              | 71       | 63   | 78    | 47    | 34         | -     |
| Isomer Shift (mm/s)         |              |          |      |       |       | 0.41       |       |
| Quadrupole Splitting (mm/s) | unknown      |          |      |       |       | 1.08       |       |
| Width (mm/s)                |              |          |      |       |       | 0.36       |       |
| Area (% of total area)      |              |          |      |       |       | 38         |       |
| Isomer Shift (mm/s)         |              |          |      |       |       | 1.48       |       |
| Quadrupole Splitting (mm/s) | unknown      |          |      |       |       | 2.12       |       |
| Width (mm/s)                |              |          |      |       |       | 0.23*      |       |
| Area (% of total area)      |              |          |      |       |       | 4          |       |
| Isomer Shift (mm/s)         |              |          |      | 0.53  | -0.14 |            |       |
| Quadrupole Splitting (mm/s) |              |          |      | -0.01 | 0.40  |            |       |
| Field (T)                   | unknown      |          |      | 27.9  | 22.5  |            |       |
| Width (mm/s)                |              |          |      | 1.13  | 0.82  |            |       |
| Area (% of total area)      |              |          |      | 22    | 16    |            |       |
| Isomer Shift (mm/s)         |              | 0.24     | 0.37 |       |       |            |       |
| Quadrupole Splitting (mm/s) |              | 0.01     | 0.02 |       |       |            |       |
| Field (T)                   | chalcopyrite | 35.6     | 37.3 |       |       |            |       |
| Width (mm/s)                |              | 0.34     | 0.82 |       |       |            |       |
| Area (% of total area)      |              | 29       | 37   |       |       |            |       |
| Isomer Shift (mm/s)         |              |          |      |       |       | 1.08       |       |
| Quadrupole Splitting (mm/s) |              |          |      |       |       | -0.53      |       |
| Field (T)                   | unknown      |          |      |       |       | 33.4       |       |
| Width (mm/s)                |              |          |      |       |       | 0.60*      |       |
| Area (% of total area)      |              |          |      |       |       | 15         |       |
| Isomer Shift (mm/s)         |              |          |      |       |       | 0.78       |       |
| Quadrupole Splitting (mm/s) |              |          |      |       |       | -0.18      |       |
| Field (T)                   | unknown      |          |      |       |       | 43.0*      |       |
| Width (mm/s)                |              |          |      |       |       | 0.60*      |       |
| Area (% of total area)      |              |          |      |       |       | 5          |       |
| Isomer Shift (mm/s)         |              |          |      |       |       | 0.49       |       |
| Quadrupole Splitting (mm/s) |              |          |      |       |       | 0.12       |       |
| Field (T)                   | unknown      |          |      |       |       | 45.5       |       |
| Width (mm/s)                |              |          |      |       |       | 0.32       |       |
| Area (% of total area)      |              |          |      |       |       | 5          |       |
| Isomer Shift (mm/s)         |              |          |      |       |       | 0.50       |       |
| Quadrupole Splitting (mm/s) | unknown      |          |      |       |       | -0.09      |       |
| Field (T)                   |              |          |      |       |       | 49.5       |       |
| Width (mm/s)                |              |          |      |       |       | 0.54       |       |

| Area (% of total area) | 12    |        |       |        |       |   |
|------------------------|-------|--------|-------|--------|-------|---|
| $\chi^2$               | 542.0 | 1245.1 | 777.0 | 1078.8 | 448.6 | - |
| $\chi^2_{\text{norm}}$ | 1.0   | 2.4    | 1.5   | 2.1    | 0.9   | - |

\*Indicates parameter held constant to obtain fit

‡Only the central doublet was fit for the 4K Hot Harold spectrum. Other distributions were too poorly resolved to obtain an accurate fit. Relative area and  $\chi^2$  values are not reported because the fit is incomplete.

§The parameters for these phases can be found in Bishop *et al.* [2014], Dyar *et al.* [2006 and 2013], Lane *et al.* [2015], and Pitman *et al.* [2014].

Table S2. Distribution of representative bacterial and archaeal 16S rRNA gene phylotypes in the interior of the actively venting hydrothermal chimneys

|                                                     | T range<br>(°C) | pH<br>range | Carbon<br>sources | O <sub>2</sub><br>preference | Phototroph | %<br>identity | Number of clones |       |               | Ref. |
|-----------------------------------------------------|-----------------|-------------|-------------------|------------------------------|------------|---------------|------------------|-------|---------------|------|
|                                                     |                 |             |                   |                              |            |               | Bastille         | Dante | Hot<br>Harold |      |
| <b>Bacteria</b>                                     |                 |             |                   |                              |            |               |                  |       |               |      |
| <i>Alphaproteobacteria</i>                          |                 |             |                   |                              |            |               |                  |       |               |      |
| <i>Methylobacterium tardum</i>                      | 15-35           | N           | AU                | AE                           | No         | 99            | 0                | 1     | 0             | 21   |
| <i>Rhodospseudomonas julia</i>                      | 25-35           | 6           | FAU               | FAN                          | Yes        | 93            | 5                | 0     | 0             | 22   |
| <i>Thalassobacter stenotrophicus</i>                | 13-37           | N           | H                 | AE                           | No*        | 94            | 1                | 0     | 0             | 27   |
| Other <i>Alphaproteobacteria</i>                    |                 |             |                   |                              |            |               | 0                | 4     | 1             |      |
| <i>Betaproteobacteria</i>                           |                 |             |                   |                              |            |               |                  |       |               |      |
| <i>Acidovorax temperans</i>                         | 37              | N           | H                 | AE                           | No         | 99            | 0                | 1     | 0             | 55   |
| <i>Delftia acidovorans</i>                          | 30              | N           | H                 | AE                           | No         | 99            | 0                | 10    | 0             | 54   |
| <i>Herbaspirillum huttiense</i> subsp. <i>putei</i> | 25-37           | N           | H                 | AE                           | No         | 99            | 0                | 3     | 0             | 9    |
| <i>Ralstonia pickettii</i>                          | 35              | N           | H                 | FAN                          | No         | 99-100        | 0                | 5     | 0             | 36   |
| <i>Roseateles depolymerans/aquatilis</i>            | 5-43            | 5-8         | H                 | AE                           | No*        | 90-99         | 0                | 19    | 25            | 49   |
| Other <i>Betaproteobacteria</i>                     |                 |             |                   |                              |            |               | 0                | 5     | 3             |      |
| <i>Gammaproteobacteria</i>                          |                 |             |                   |                              |            |               |                  |       |               |      |
| <i>Marinobacter lutaoensis</i>                      | 25-50           | 5-9         | H                 | AE                           | No         | 90            | 0                | 1     | 1             | 43   |
| <i>Thioalkalivibrio denitrificans/nitratis</i>      | up to 47        | 7.5-10.7    | AU                | FAN                          | No         | 88-92         | 0                | 1     | 3             | 46   |
| <i>Enterbacter pyrinus</i>                          | 27-36           | N           | H                 | FAN                          | No         | 97            | 0                | 1     | 0             | 8    |
| <i>Kangiella koreensis</i>                          | 4-43            | 5.5-8       | H                 | FAN                          | No         | 90-91         | 2                | 0     | 0             | 59   |
| <i>Alcanivorax hongdengensis</i>                    | 10-42           | 4-10        | H                 | AE                           | No         | 90            | 0                | 0     | 1             | 56   |
| <i>Endozoicomonas elysicola</i>                     | 4-37            | N           | H                 | AE                           | No         | 91            | 0                | 0     | 1             | 23   |
| <i>Acinetobacter junii/calcoaceticus/johnsonii</i>  | 15-37           | N           | H                 | AE                           | No         | 97-98         | 0                | 6     | 0             | 5    |
| <i>Pseudomonas fulva/hibiscicola/panacis</i>        | 4-37            | N           | H                 | AE                           | No         | 98-99         | 0                | 3     | 2             | 51   |
| <i>Leucothrix mucor</i>                             | 15-35           | N           | H                 | AE                           | No         | 90-91         | 2                | 0     | 1             | 15   |
| <i>Sedimenticola selenatireducens</i>               | 28              | N           | H                 | AN                           | No         | 93            | 1                | 0     | 0             | 32   |
| <i>Stenotrophomonas maltophila</i>                  | 35              | N           | H                 | AE                           | No         | 98            | 0                | 2     | 0             | 33   |
| Other <i>Gammaproteobacteria</i>                    |                 |             |                   |                              |            |               | 0                | 4     | 0             |      |

\*Produces bacteriochlorophyll *a*

|                                                | T range<br>(°C) | pH<br>range | Carbon<br>sources | O <sub>2</sub><br>preference | Phototroph | %<br>identity | Number of clones |       |               | Ref.  |
|------------------------------------------------|-----------------|-------------|-------------------|------------------------------|------------|---------------|------------------|-------|---------------|-------|
|                                                |                 |             |                   |                              |            |               | Bastille         | Dante | Hot<br>Harold |       |
| <i>Deltaproteobacteria</i>                     |                 |             |                   |                              |            |               |                  |       |               |       |
| <i>Desulfobulbus mediterraneus</i>             | 10-30           | 6.3-8.0     | H                 | AN                           | No         | 87-99         | 15               | 0     | 1             | 38    |
| <i>Desulfobacterium indolicum/anilini</i>      | 30              | 7.2         | H                 | AN                           | No         | 84-91         | 8                | 0     | 0             | 3, 40 |
| <i>Desulfocapsa sulfexigens</i>                | 5-35            | 6-8.2       | AU                | AN                           | No         | 91            | 1                | 0     | 0             | 13    |
| <i>Desulfococcus multivorans</i>               | 35              | N           | H                 | AN                           | No         | 87            | 1                | 0     | 0             | -     |
| <i>Geothermobacter ehrlichii</i>               | 35-65           | 5-8         | H                 | AN                           | No         | 80-85         | 3                | 0     | 0             | 20    |
| <i>Desulfuromonas svalbardensis</i>            | -2-20           | 6.5-7.5     | H                 | AN                           | No         | 86            | 1                | 0     | 0             | 52    |
| <i>Desulfonatronum lacustre</i>                | 37-40           | 8-10        | H                 | AN                           | No         | 81            | 2                | 1     | 0             | 34    |
| <i>Desulfomonile limimaris</i>                 | 37              | N           | H                 | AN                           | No         | 92            | 1                | 0     | 0             | 48    |
| Other <i>Deltaproteobacteria</i>               |                 |             |                   |                              |            |               | 1                | 0     | 0             |       |
| <i>Epsilonproteobacteria</i>                   |                 |             |                   |                              |            |               |                  |       |               |       |
| <i>Sulfurovum lithotrophicum</i>               | 10-40           | 5-9         | AU                | FAN                          | No         | 90-99         | 2                | 1     | 1             | 17    |
| <i>Nitratiruptor tergaricus</i>                | 40-57           | 5.4-6.9     | AU                | FAN                          | No         | 92-94         | 0                | 0     | 2             | 31    |
| <i>Nitratifactor salsuginis</i>                | 28-40           | 5.6-7.6     | AU                | FAN                          | No         | 90-96         | 1                | 1     | 4             | 31    |
| <i>Sulfurospirillum halorespirans</i>          | 25-30           | N           | H                 | AN                           | No         | 90            | 1                | 0     | 0             | 26    |
| <i>Hydrogenimonas thermophila</i>              | 35-65           | 4.9-7.2     | AU                | FAN                          | No         | 89-91         | 1                | 2     | 0             | 50    |
| <i>Helicobacter pullorum</i>                   | 37-42           | N           | H                 | MAE                          | No         | 87            | 4                | 0     | 0             | 47    |
| <i>Sulfurimonas autotrophica/paralvinellae</i> | 10-40           | 4.5-9       | AU                | AE                           | No         | 88-95         | 0                | 1     | 12            | 16    |
| <i>Caminibacter profundus</i>                  | 45-65           | 6.5-7.4     | AU                | AN                           | No         | 93            | 0                | 0     | 1             | 29    |
| Other <i>Epsilonproteobacteria</i>             |                 |             |                   |                              |            |               | 1                | 0     | 0             |       |
| <i>Actinobacteria</i>                          |                 |             |                   |                              |            |               |                  |       |               |       |
| <i>Aquificae</i>                               |                 |             |                   |                              |            |               |                  |       |               |       |
| <i>Desulfurobacterium pacificum</i>            | 55-85           | 5.5-7.5     | AU                | AN                           | No         | 96            | 0                | 0     | 2             | 25    |
| CFB Group                                      |                 |             |                   |                              |            |               |                  |       |               |       |
| <i>Alkaliflexus imshenetskii</i>               | 28-35           | 7.5-10.2    | H                 | AN                           | No         | 85            | 1                | 0     | 0             | 60    |
| <i>Chlorobium</i> sp.                          | 25              | N           | AU                | AN                           | Yes        | 80-83         | 2                | 0     | 0             | 30    |
| <i>Salinimicrobium catena</i>                  | 15-42           | 6.5-9       | H                 | AE                           | No         | 84-85         | 2                | 0     | 0             | 58    |
| Other CFB Group                                |                 |             |                   |                              |            |               | 0                | 0     | 1             |       |
| <i>Chloroflexi</i>                             |                 |             |                   |                              |            |               |                  |       |               |       |
| <i>Anaerolinea thermophila</i>                 | 50-60           | 6-8         | H                 | AN                           | No         | 82            | 2                | 0     | 0             | 41    |
| <i>Levilinea saccharolytica</i>                | 25-50           | 6-7.2       | H                 | AN                           | No         | 90            | 1                | 0     | 0             | 57    |
| <i>Cyanobacteria</i>                           |                 |             |                   |                              |            |               |                  |       |               |       |
| <i>Prochlorococcus marinus</i>                 |                 |             | AU                | AE                           | Yes        | 89            | 0                | 1     | 0             | 7     |

|                                        | T range<br>(°C) | pH<br>range | Carbon<br>sources | O <sub>2</sub><br>preference | Phototroph | %<br>identity | Number of clones |       |               | Ref. |
|----------------------------------------|-----------------|-------------|-------------------|------------------------------|------------|---------------|------------------|-------|---------------|------|
|                                        |                 |             |                   |                              |            |               | Bastille         | Dante | Hot<br>Harold |      |
| <i>Deinococcus-Thermus</i>             |                 |             |                   |                              |            |               |                  |       |               |      |
| <i>Oceanithermus desulfurans</i>       | 40-68           | 5.5-8.4     | FAU               | MAE                          | No         | 99            | 1                | 0     | 0             | 28   |
| <i>Firmicutes</i>                      |                 |             |                   |                              |            |               |                  |       |               |      |
| <i>Clostridium tepidiprofundum</i>     | 22-60           | 4-8.5       | H                 | AN                           | No         | 80            | 2                | 0     | 0             | 44   |
| <i>Planctomycetes</i>                  |                 |             |                   |                              |            |               |                  |       |               |      |
| <i>Pirellula baltica/staleyii</i>      | 28-30           | N           | H                 | AE                           | No         | 86-87         | 3                | 0     | 0             | 39   |
| <b>Archaea</b>                         |                 |             |                   |                              |            |               |                  |       |               |      |
| <i>Thermococci</i>                     |                 |             |                   |                              |            |               |                  |       |               |      |
| <i>Thermococcus onnurineus/nautili</i> | 63-90           | 5-9         | H                 | AN                           | No         | 86-87         | 11               | 0     | 0             | 2    |
| <i>Methanococci</i>                    |                 |             |                   |                              |            |               |                  |       |               |      |
| <i>Methanocaldococcus infernus</i>     | 55-91           | 5.3-7       | AU                | AN                           | No         | 88            | 3                | 0     | 0             | 19   |
| <i>Archaeoglobi</i>                    |                 |             |                   |                              |            |               |                  |       |               |      |
| <i>Ferroglobus placidus</i>            | 65-95           | 6-8.5       | AU                | AN                           | No         | 80            | 1                | 0     | 0             | 14   |
| <i>Geoglobus acetivorans</i>           | 50-85           | 5-7.5       | FAU               | AN                           | No         | 79            | 1                | 0     | 0             | 45   |
| <i>Other Euryarchaeota</i>             |                 |             |                   |                              |            |               |                  |       |               |      |
| <i>Aciduliprofundum boonei</i>         | 55-75           | 3.3-5.8     | H                 | AN                           | No         | 86            | 1                | 0     | 0             | 37   |
| <i>Thermoprotei</i>                    |                 |             |                   |                              |            |               |                  |       |               |      |
| <i>Vulcanisaeta distributa</i>         | 70-92           | 3.5-5.6     | H                 | AN                           | No         | 78-93         | 3                | 0     | 0             | 18   |
| <i>Hyperthermus butylicus</i>          | 85-108          | 7           | H                 | AN                           | No         | 92            | 1                | 0     | 0             | 61   |
| <i>Korarchaeota</i>                    |                 |             |                   |                              |            |               |                  |       |               |      |
| <i>Korarchaeum cryptofilum</i>         | 85              | 6.5         | H                 | AN                           | No         | 94            | 2                | 0     | 0             | 12   |

Abbreviations: N, neutrophile; AE, aerobe; AN, anaerobe; AU, autotroph; FAN, facultative anaerobe; H, heterotroph; MAE, microaerophile.

Table S3. Diversity indices for the Bastille, Dante and Hot Harold hydrothermal chimneys used in this study

|                                      | Bastille | Dante  | Hot Harold |
|--------------------------------------|----------|--------|------------|
| <b><math>\alpha</math> Diversity</b> |          |        |            |
| Chao1 <sup>a</sup>                   | 15.13    | 18.34  | 11.20      |
| Shannon index <sup>b</sup>           | 3.75     | 3.57   | 2.84       |
| Observed Species                     | 15.0     | 16.2   | 11.0       |
| <b><math>\beta</math> Diversity</b>  |          |        |            |
| UNiFRac                              |          |        |            |
| Bastille                             | 0.0      | 0.7336 | 0.6684     |
| Dante                                |          | 0.0    | 0.3715     |
| Hot Harold                           |          |        | 0.0        |
| Weighted UNiFRac                     |          |        |            |
| Bastille                             | 0.0      | 0.5926 | 0.5634     |
| Dante                                |          | 0.0    | 0.1963     |
| Hot Harold                           |          |        | 0.0        |

<sup>a</sup>Chao1 richness estimator [*Chao*, 1987]

<sup>b</sup>Shannon diversity index [*Shannon*, 1948]

Table S4. Most-probable-cell estimates of various hyperthermophilic anaerobes per gram of hydrothermal mineral material. Enrichments were incubated at 90°C

| Sample     | Most-probable-number estimates |                          |                           |
|------------|--------------------------------|--------------------------|---------------------------|
|            | Iron reducers                  | Methanogens <sup>a</sup> | Heterotrophs <sup>a</sup> |
| Bastille   | 108                            | 34                       | 3,470                     |
| Dante      | 13                             | 4                        | 511                       |
| Hot Harold | 106                            | ND                       | 1,061                     |

<sup>a</sup>Results previously reported in *Ver Eecke et al.* [2012]

## References

1. Amend, J. P., T. M. McCollom, M. Hentscher, and W. Bach (2011), Catabolic and anabolic energy for chemolithoautotrophs in deep-sea hydrothermal systems hosted in different rock types, *Geochim. Cosmochim. Acta*, *75*, 5736-5748.
2. Bae, S. S., Y. J. Kim, S. H. Yang, J. K. Lim, J. H. Jeon, H. S. Lee, S. G. Kang, S. J. Kim, and J. H. Lee (2006), *Thermococcus onnurineus* sp. nov., a hyperthermophilic archaeon isolated from a deep-sea hydrothermal vent area at the PACMANUS Field, *J. Microbiol. Biotechnol.*, *16*, 1826-1831.
3. Bak, F., and F. Widdel (1986), Anaerobic degradation of indolic compounds by sulfate-reducing enrichment cultures, and description of *Desulfobacterium indolicum* gen. nov., sp. nov., *Arch. Microbiol.*, *146*, 170-176.
4. Bishop, J. L., M. D. Lane, M. D. Dyar, S. J. King, A. J. Brown, and G. Swayze (2014), Spectral properties of Ca-sulfates: gypsum, bassanite and anhydrite. *Am. Mineral.*, *99*, 2105-2115.
5. Bouvet, P. J. M., and P. A. D. Grimont (1986), Taxonomy of the genus *Acinetobacter* with the recognition of *Acinetobacter baumannii* sp. nov., *Acinetobacter haemolyticus* sp. nov., *Acinetobacter johnsonii* sp. nov., and *Acinetobacter junii* sp. nov. and emended descriptions of *Acinetobacter calcoaceticus* and *Acinetobacter lwoffii*, *Int. J. Syst. Bacteriol.*, *36*, 228-240.
6. Chao, A. (1987), Estimating the population size for capture-recapture data with unequal catchability, *Biometrics*, *43*, 783-791.
7. Chisholm, S. W., S. L. Frankel, R. Goericke, R. J. Olson, B. Palenik, J. B. Waterbury, L. West-Johnsrud, and E. R. Zettler (1992), *Prochlorococcus marinus* nov. gen. nov. sp.: an oxyphototrophic marine prokaryote containing divinyl chlorophyll *a* and *b*, *Arch. Microbiol.*, *157*, 297-300.
8. Chung, Y. R., D. J. Brenner, A. G. Steigerwalt, B. S. Kim, H. T. Kim, and K. Y. Cho (1993), *Enterobacter pyrinus* sp. nov., an organism associated with brown leaf spot disease of pear trees, *Int. J. Syst. Bacteriol.*, *43*, 157-161.
9. Dobritsa, A. P., M. C. S. Reddy, and M. Samadpour (2010), Reclassification of *Herbaspirillum putei* as a later heterotypic synonym of *Herbaspirillum huttiense*, with the description of *H. huttiense* subsp. *huttiense* subsp. nov. and *H. huttiense* subsp. *putei* subsp. nov., comb. nov., and description of *Herbaspirillum aquaticum* sp. nov., *Int. J. Syst. Evol. Microbiol.*, *60*, 1418-1426.
10. Dyar, M. D., D. G. Agresti, M. Schaefer, C. A. Grant, and E. C. Sklute (2006) Mössbauer spectroscopy of earth and planetary materials, *Ann. Rev. Earth Planet. Sci.*, *34*, 83-125.
11. Dyar, M. D., E. A. Breves, E. Jawin, G. Marchand, M. Nelms, V. O'Connor, S. Peel, Y. Rothstein, E. C. Sklute, M. D. Lane, J. L. Bishop, and S. A. Mertzman (2013), Mössbauer parameters of iron in sulfate minerals, *Amer. Mineral.*, *98*, 1943-1965.
12. Elkins, J. G., M. Podar, D. E. Graham, K. S. Makarova, Y. Wolf, L. Randau, B. P. Hedlund, C. Brochier-Armanet, V. Kunin, I. Anderson, A. Lapidus, E. Goltsman, K. Barry, E. V. Koonin, P. Hugenholtz, N. Kyrpides, G. Wanner, P. Richardson, M. Keller, and K. O. Stetter (2008), A korarchaeal genome reveals insights into the evolution of the Archaea, *Proc. Natl. Acad. Sci. USA*, *105*, 8102-8107.
13. Finster, K., W. Liesack, and B. Thamdrup (1998), Elemental sulfur and thiosulfate disproportionation by *Desulfocapsa sulfoexigens* sp. nov., a new anaerobic bacterium isolated from marine surface sediments, *Appl. Environ. Microbiol.*, *64*, 119-125.



14. Hafenbradl, D., M. Keller, R. Dirmeier, R. Rachel, P. Rossnagel, S. Burggraf, H. Huber, and K. O. Stetter (1996), *Ferroglobus placidus* gen. nov., sp. nov., a novel hyperthermophilic archaeum that oxidizes Fe<sup>2+</sup> at neutral pH under anoxic conditions, *Arch. Microbiol.*, *166*, 308-314.
15. Harold, R., and R. Y. Stanier (1955), The genera *Leucothrix* and *Thiothrix*, *Bacteriological Rev.*, *19*, 49-64.
16. Inagaki, F., K. Takai, H. Kobayashi, K. H. Nealson, and K. Horikoshi (2003), *Sulfurimonas autotrophica* gen. nov., sp. nov., a novel sulfur-oxidizing  $\epsilon$ -proteobacterium isolated from hydrothermal sediments in the Mid-Okinawa Trough, *Int. J. Syst. Evol. Microbiol.*, *53*, 1801-1805.
17. Inagaki, F., K. Takai, K. H. Nealson, and K. Horikoshi (2004), *Sulfurovum lithotrophicum* gen. nov., sp. nov., a novel sulfur-oxidizing chemolithoautotroph within the  $\epsilon$ -*Proteobacteria* isolated from Okinawa Trough hydrothermal sediments, *Int. J. Syst. Evol. Microbiol.*, *54*, 1477-1482.
18. Itoh, T., K. Suzuki, and T. Nakase (2002), *Vulcanisaeta distributa* gen. nov., sp. nov., and *Vulcanisaeta souniana* sp. nov., novel hyperthermophilic, rod-shaped crenarchaeotes isolated from hot springs in Japan, *Int. J. Syst. Evol. Microbiol.*, *52*, 1097-1104.
19. Jeanthon, C., S. L'Haridon, A.-L. Reysenbach, M. Vernet, P. Messner, U. B. Sleytr, and D. Prieur (1998), *Methanococcus infernus* sp. nov., a novel hyperthermophilic lithotrophic methanogen isolated from a deep-sea hydrothermal vent, *Int. J. Syst. Evol. Microbiol.*, *48*, 913-919.
20. Kashefi, K., D. E. Holmes, J. A. Baross, and D. R. Lovley (2003), Thermophily in the *Geobacteraceae*: *Geothermobacter ehrlichii* gen. nov., sp. nov., a novel thermophilic member of the *Geobacteraceae* from the "Bag City" hydrothermal vent, *Appl. Environ. Microbiol.*, *69*, 2985-2993.
21. Kato, Y., M. Asahara, K. Goto, H. Kasai, and A. Yokota (2008), *Methylobacterium persicinum* sp. nov., *Methylobacterium komagatae* sp. nov., *Methylobacterium brachiatum* sp. nov., *Methylobacterium tardum* sp. nov., and *Methylobacterium gregans* sp. nov., isolated from freshwater, *Int. J. Syst. Evol. Microbiol.*, *58*, 1134-1141.
22. Kompantseva, E. I. (1989), A new species of the budding purple bacterium *Rhodopseudomonas julia* sp. nov., *Mikrobiologiya*, *58*, 319-325.
23. Kurahashi, M., and A. Yokota (2007), *Endozoicomonas elysicola* gen. nov., sp. nov., a  $\gamma$ -proteobacterium isolated from the sea slug *Elysia ornate*, *Syst. Appl. Microbiol.*, *30*, 202-206.
24. Lane, M.D., J. L. Bishop, M. D. Dyar, T. Hiroi, S. A. Mertzman, D. L. Bish, P. L. King, and A. D. Rogers (2015), Mid-infrared emission spectroscopy and visible/near-infrared reflectance spectroscopy of Fe-sulfate minerals, *Amer. Mineral.*, *100*, 66-82.
25. L'Haridon, S., A.-L. Reysenbach, B. J. Tindall, P. Schönheit, A. Banta, U. Johnsen, P. Schumann, A. Gambacorta, E. Stackebrandt, and C. Jeanthon (2006), *Desulfurobacterium atlanticum* sp. nov., *Desulfurobacterium pacificum* sp. nov. and *Thermovibrio guaymasensis* sp. nov., three thermophilic members of the *Desulfurobacteriaceae* fam. nov., a deep branching lineage within the *Bacteria*, *Int. J. Syst. Evol. Microbiol.*, *56*, 2843-2852.
26. Luijten, M. L. G. C., J. de Weert, H. Smidt, H. T. S. Boschker, W. M. de Vos, G. Schraa, and A. J. M. Stams (2003), Description of *Sulfurospirillum halospirans* sp. nov., an anaerobic, tetrachloroethane-respiring bacterium, and transfer of *Dehalospirillum multivorans* to the genus *Sulfurospirillum* as *Sulfurospirillum multivorans* comb. nov., *Int. J. Syst. Evol. Microbiol.*, *53*, 787-793.

27. Macián, M. C., D. R. Arahál, E. Garay, W. Ludwig, K. H. Schleifer, and M. J. Pujalte (2005), *Thalassobacter stenotrophicus* gen. nov., sp. nov., a novel marine  $\alpha$ -proteobacterium isolated from Mediterranean sea water, *Int. J. Syst. Evol. Microbiol.*, *55*, 105-110.
28. Miroshnichenko, M. L., S. L'Haridon, C. Jeanthon, A. N. Antipov, N. A. Kostrikina, B. J. Tindall, P. Schumann, S. Spring, E. Stackebrandt, and E. A. Bonch-Osmolovskaya (2003), *Oceanithermus profundus* gen. nov., sp. nov., a thermophilic, microaerophilic, facultatively chemolithoautotrophic bacterium from a deep-sea hydrothermal vent, *Int. J. Syst. Evol. Microbiol.*, *53*, 747-752.
29. Miroshnichenko, M. L., S. L'Haridon, P. Schumann, S. Spring, E. A. Bonch-Osmolovskaya, C. Jeanthon, and E. Stackebrandt (2004), *Caminiobacter profundus* sp. nov., a novel thermophile of *Nautiliales* ord. nov. within the class 'Epsilonproteobacteria', isolated from a deep-sea hydrothermal vent, *Int. J. Syst. Evol. Microbiol.*, *54*, 41-45.
30. Montesinos, E., R. Guerrero, C. Abella, and I. Esteve (1983), Ecology and physiology of the competition for light between *Chlorobium limicola* and *Chlorobium phaeobacteroides* in natural habitats, *Appl. Environ. Microbiol.*, *46*, 1007-1016.
31. Nakagawa, S., K. Takai, F. Inagaki, K. Horikoshi, and Y. Sako (2005), *Nitratiruptor tergaricus* gen. nov., sp. nov. and *Nitratifractor salsuginis* gen. nov., sp. nov., nitrate-reducing chemolithoautotrophs of the  $\epsilon$ -*Proteobacteria* isolated from a deep-sea hydrothermal system in the Mid-Okinawa Trough, *Int. J. Syst. Evol. Microbiol.*, *55*, 925-933.
32. Narasingarao, P., and M. M. Häggblom (2006), *Sedimenticola selenatireducens*, gen. nov., sp. nov., an anaerobic selenite-respiring bacterium isolated from estuarine sediment, *Syst. Appl. Microbiol.*, *29*, 382-388.
33. Palleroni, N. J., and J. F. Bradbury (1993), *Stenotrophomonas*, a new bacterial genus for *Xanthomonas maltophila* (Hugh 1980) Swings et al. 1983, *Int. J. Syst. Bacteriol.*, *43*, 606-609.
34. Pikuta, E. V., T. N. Zhilina, G. A. Zavarzin, N. A. Kostrikina, G. A. Osipov, and F. A. Rainey (1998), *Desulfonatronum lacustre* gen. nov., sp. nov.: a new alkaliphilic sulfate-reducing bacterium utilizing ethanol. *Mikrobiologiya*, *67*, 123-131.
35. Pitman, K. M., E. Z. Noe Dobrea, C. S. Jamieson, J. B. Dalton III, W. J. Abbey, and E. C. S. Joseph (2014) Reflectance spectroscopy and optical functions for hydrated Fe-sulfates, *Amer. Mineral.*, *99*, 1593-1603.
36. Ralston, E., N. J. Palleroni, and M. Doudoroff (1973), *Pseudomonas pickettii*, a new species of clinical origin related to *Pseudomonas solanacearum*, *Int. J. Syst. Bacteriol.*, *23*, 15-19.
37. Reysenbach, A.-L., Y. Liu, A. B. Banta, T. J. Beveridge, J. D. Kirshtein, S. Schouten, M. K. Tivey, K. L. Von Damm, and M. A. Voytek (2006), A ubiquitous thermoacidophilic archaeon from deep-sea hydrothermal vents, *Nature*, *442*, 444-447.
38. Sass, A., H. Rütters, H. Cypionka, and H. Sass (2002), *Desulfobulbus mediterraneus* sp. nov., a sulfate-reducing bacterium growing on mono- and disaccharides, *Arch. Microbiol.*, *177*, 468-474.
39. Schlesner, H., C. Rensmann, B. J. Tindall, D. Gade, R. Rabus, S. Pfeiffer, and P. Hirsch (2004), Taxonomic heterogeneity within the Planctomycetales as derived by DNA-DNA hybridization, description of *Rhodopirellula baltica* gen. nov., sp. nov., transfer of *Pirellula marina* to the genus *Blastopirellula* gen. nov. as *Blastopirellula marina* comb. nov. and emended description of the genus *Pirellula*, *Int. J. Syst. Evol. Microbiol.*, *54*, 1567-1580.

40. Schnell, S., F. Bak, and N. Pfennig (1989), Anaerobic degradation of aniline and dihydroxybenzenes by newly isolated sulfate-reducing bacteria and description of *Desulfobacterium anilini*, *Arch. Microbiol.*, *152*, 556-563.
41. Sekiguchi, Y., T. Yamada, S. Hanada, A. Ohashi, H. Harada, and Y. Kamagata (2003), *Anaerolinea thermophila* gen. nov., sp. nov. and *Caldilinea aerophila* gen. nov., sp. nov., novel filamentous thermophiles that represent a previously uncultured lineage of the domain *Bacteria* at the subphylum level, *Int. J. Syst. Evol. Microbiol.*, *53*, 1843-1851.
42. Shannon, C. E. (1948), A mathematical theory of communication, *Bell Syst. Tech. J.*, *27*, 379-423 and 623-656.
43. Shieh, W. Y., W. D. Jean, Y. T. Lin, and M. Tseng (2003), *Marinobacter lutaensis* sp. nov., a thermotolerant marine bacterium isolated from a coastal hot spring in Luta, Taiwan, *Can. J. Microbiol.*, *49*, 244-252.
44. Slobodkina, G. B., T. V. Kolganova, T. P. Tourova, N. A. Kostrikina, C. Jeanthon, E. A. Bonch-Osmolovskaya, and A. I. Slobodkin (2008), *Clostridium tepidiprofundum* sp. nov., a moderately thermophilic bacterium from a deep-sea hydrothermal vent, *Int. J. Syst. Evol. Microbiol.*, *58*, 852-855.
45. Slobodkina, G. B., T. V. Kolganova, J. Querellou, E. A. Bonch-Osmolovskaya, and A. I. Slobodkin (2009), *Geoglobus acetivorans* sp. nov., an iron(III)-reducing archaeon from a deep-sea hydrothermal vent, *Int. J. Syst. Evol. Microbiol.*, *59*, 2880-2883.
46. Sorokin, D. Y., A. M. Lysenko, L. L. Mityushina, T. P. Tourova, B. E. Jones, F. A. Rainey, L. A. Robertson, and G. J. Kuenen (2001), *Thioalkalimicrobium aerophilum* gen. nov., sp. nov. and *Thioalkalimicrobium sibericum* sp. nov., and *Thioalkalivibrio versutus* gen. nov., sp. nov., *Thioalkalivibrio nitratis* sp. nov., and *Thioalkalivibrio denitrificans* sp. nov., novel obligately alkaliphilic and obligately chemolithoautotrophic sulfur-oxidizing bacteria from soda lake, *Int. J. Syst. Evol. Microbiol.*, *51*, 565-580.
47. Stanley, J., D. Linton, A. P. Burnens, F. E. Dewhirst, S. L. W. On, A. Porter, R. J. Owen, and M. Costas (1994), *Helicobacter pullorum* sp. nov. – genotype and phenotype of a new species isolated from poultry and from human patients with gastroenteritis, *Microbiology*, *140*, 3441-3449.
48. Sun, B., J. R. Cole, and J. M. Tiedje (2001), *Desulfomonile limimaris* sp. nov., an anaerobic dehalogenating bacterium from marine sediments, *Int. J. Syst. Evol. Microbiol.*, *51*, 365-371.
49. Suyama, T., T. Shigematsu, S. Takaichi, Y. Nodasaka, S. Fujikawa, H. Hosoya, Y. Tokiwa, T. Kanagawa, and S. Hanada (1999), *Roseateles depolymerans* gen. nov., sp. nov., a new bacteriochlorophyll *a*-containing obligate aerobe belonging to the  $\beta$ -subclass of the *Proteobacteria*, *Int. J. Syst. Bacteriol.*, *49*, 449-457.
50. Takai, K., K. H. Nealson, and K. Horikoshi (2004), *Hydrogenimonas thermophila* gen. nov., sp. nov., a novel thermophilic, hydrogen-oxidizing chemolithoautotroph within the  $\epsilon$ -*Proteobacteria*, isolated from a black smoker in a Central Indian Ridge hydrothermal field, *Int. J. Syst. Evol. Microbiol.*, *54*, 25-32.
51. Uchino, M., O. Shida, T. Uchimura, and K. Komagata (2001), Recharacterization of *Pseudomonas fulva* Iizuka and Komagata 1963, and proposals of *Pseudomonas parafulva* sp. nov. and *Pseudomonas cremoricolorata* sp. nov., *J. Gen. Appl. Microbiol.*, *47*, 247-261.
52. Vandieken, V., M. Mußmann, H. Niemann, and B. B. Jørgensen (2006), *Desulfuromonas svalbardensis* sp. nov. and *Desulfuromusa ferrireducens* sp. nov., psychrophilic, Fe(III)-reducing bacteria isolated from Arctic sediments, Svalbard, *Int. J. Syst. Evol. Microbiol.*, *56*, 1133-1139.

53. Ver Eecke, H. C., D. A. Butterfield, J. A. Huber, M. D. Lilley, E. J. Olson, K. K. Roe, L. J. Evans, A. Y. Merkel, H. V. Cantin, and J. F. Holden (2012), Hydrogen-limited growth of hyperthermophilic methanogens at deep-sea hydrothermal vents, *Proc. Natl. Acad. Sci. USA*, *109*, 13,674-13,679.
54. Wen, A., M. Fegan, C. Hayward, S. Chakraborty, and L. I. Sly (1999), Phylogenetic relationships among members of the *Comamonadaceae*, and description of *Delftia acidovorans* (den Dooren de Jong 1926 and Tamaoka *et al.* 1987) gen. nov., comb. nov., *Int. J. Syst. Bacteriol.*, *49*, 567-576.
55. Willems, A., E. Falsen, B. Pot, E. Jantzen, B. Hoste, P. Vandamme, M. Gillis, K. Kersters, and J. De Ley (1990), *Acidovorax*, a new genus for *Pseudomonas facilis*, *Pseudomonas delafieldii*, E. Falsen (EF) Group 13, EF Group 16, and several clinical isolates, with the species *Acidovorax facilis* comb. nov., *Acidovorax delafieldii* comb. nov., and *Acidovorax temperans* sp. nov., *Int. J. Syst. Bacteriol.*, *40*, 384-398.
56. Wu, Y., Q. Lai, Z. Zhou, N. Qiao, C. Liu, and Z. Shao (2009), *Alcanivorax hongdengensis* sp. nov., an alkane-degrading bacterium isolated from surface seawater of the straits of Malacca and Singapore, producing a lipopeptide as its biosurfactant, *Int. J. Syst. Evol. Microbiol.*, *59*, 1474-1479.
57. Yamada, T., Y. Sekiguchi, S. Hanada, H. Imachi, A. Ohashi, H. Harada, and Y. Kamagata (2006), *Anaerolinea thermolimos* sp. nov., *Levilinea saccharolytica* gen. nov., sp. nov. and *Leptolinea tardivitalis* gen. nov., sp. nov., novel filamentous anaerobes, and description of the new classes *Anaerolineae* classis nov. and *Caldilineae* classis nov. in the bacterial phylum *Chloroflexi*, *Int. J. Syst. Evol. Microbiol.*, *56*, 1331-1340.
58. Ying, J. Y., Z. P. Liu, B. J. Wang, X. Dai, S. S. Yang, and S. J. Liu (2007), *Salentibacter catena* sp. nov., isolated from sediment of the South China Sea, and emended description of the genus *Salagentibacter*, *Int. J. Syst. Evol. Microbiol.*, *57*, 219-222.
59. Yoon, J. H., T. K. Oh, and Y. H. Park (2004), *Kangiella koreensis* gen. nov., sp. nov. and *Kangiella aquimarina* sp. nov., isolated from a tidal flat of the Yellow Sea in Korea, *Int. J. Syst. Evol. Microbiol.*, *54*, 1829-1835.
60. Zhilina, T. N., R. Appel, C. Probian, E. L. Brossa, J. Harder, F. Widdel, and G. A. Zavarzin (2004), *Alkaliflexus imshenetskii* gen. nov. sp. nov., a new alkaliphilic gliding carbohydrate-fermenting bacterium with propionate formation from a soda lake, *Arch. Microbiol.*, *182*, 244-253.
61. Zillig, W., I. Holz, D. Janekovic, H.-P. Klenk, E. Imsel, J. Trent, S. Wunderl, V. H. Forjaz, R. Coutinho, and T. Ferreira (1990), *Hyperthermus butylicus*, a hyperthermophilic sulfur-reducing archaeobacterium that ferments peptides, *J. Bacteriol.*, *172*, 3959-3965.
